# Supplementary material for: Evolution of honey resistance in experimental populations of bacteria depends on the type of honey and has no major side effects for antibiotic susceptibility
Source: PubMed Central journal article supplement (PMC8127710; doi:10.1111/eva.13200), 2021-03-10

**A**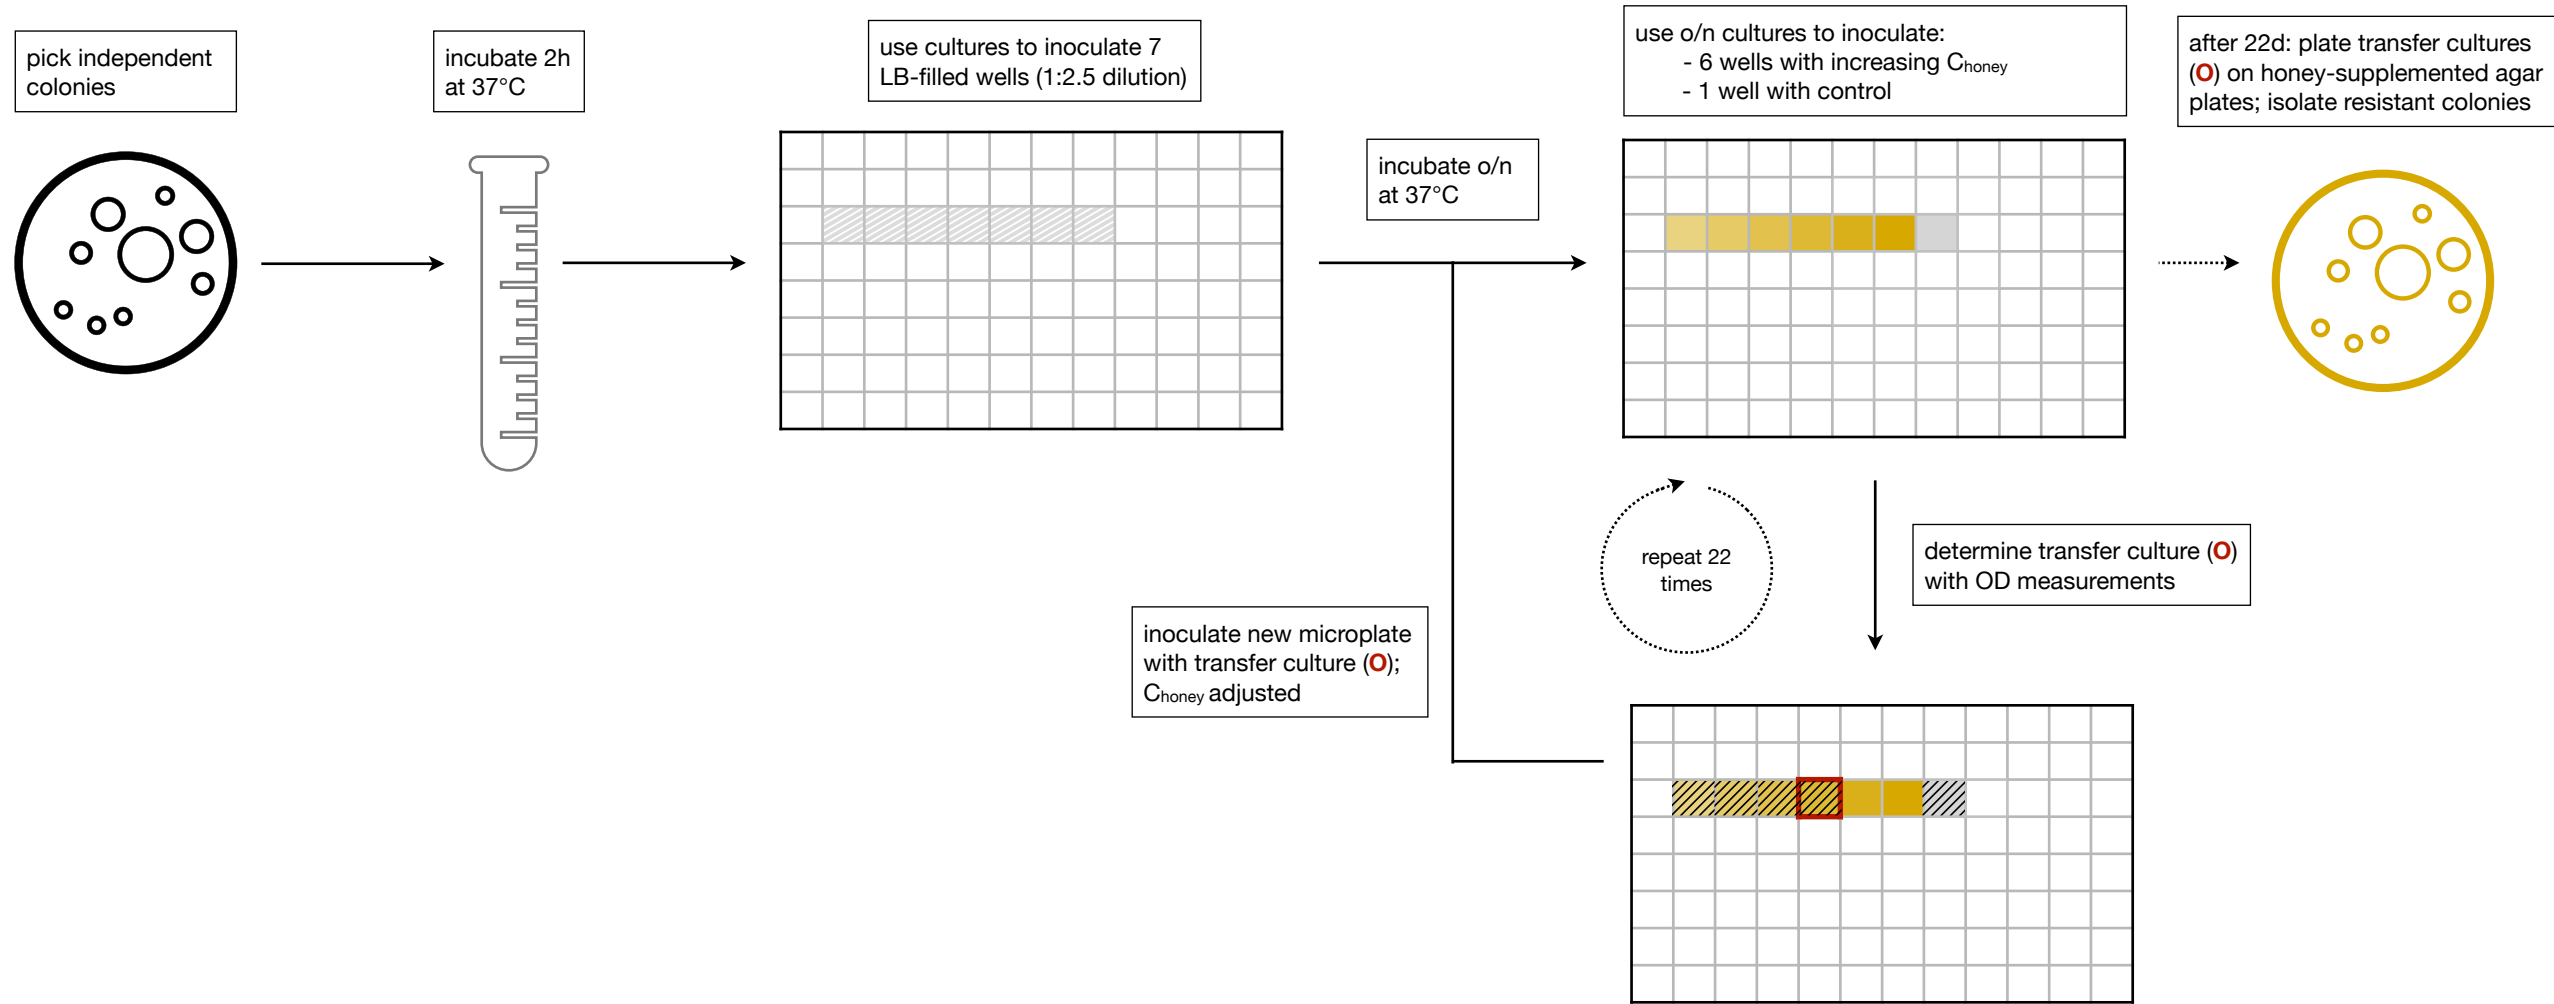**B**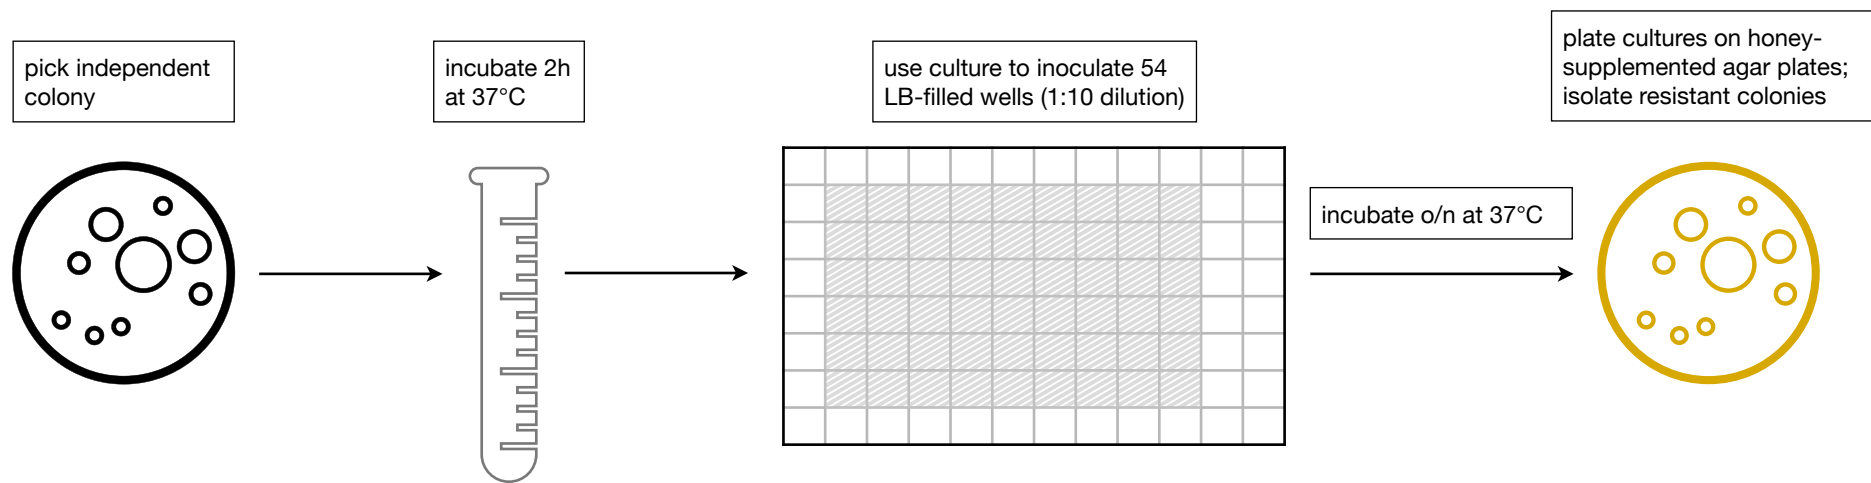

Supplement: EVA-14-1314-s003.pdf [file EVA-14-1314-s003.pdf]
